# Supplementary material
Source: PubMed Central journal article supplement (PMC4429597)
Supplement: NIHMS687526-supplement-S1.pdf [file NIHMS687526-supplement-S1.pdf]

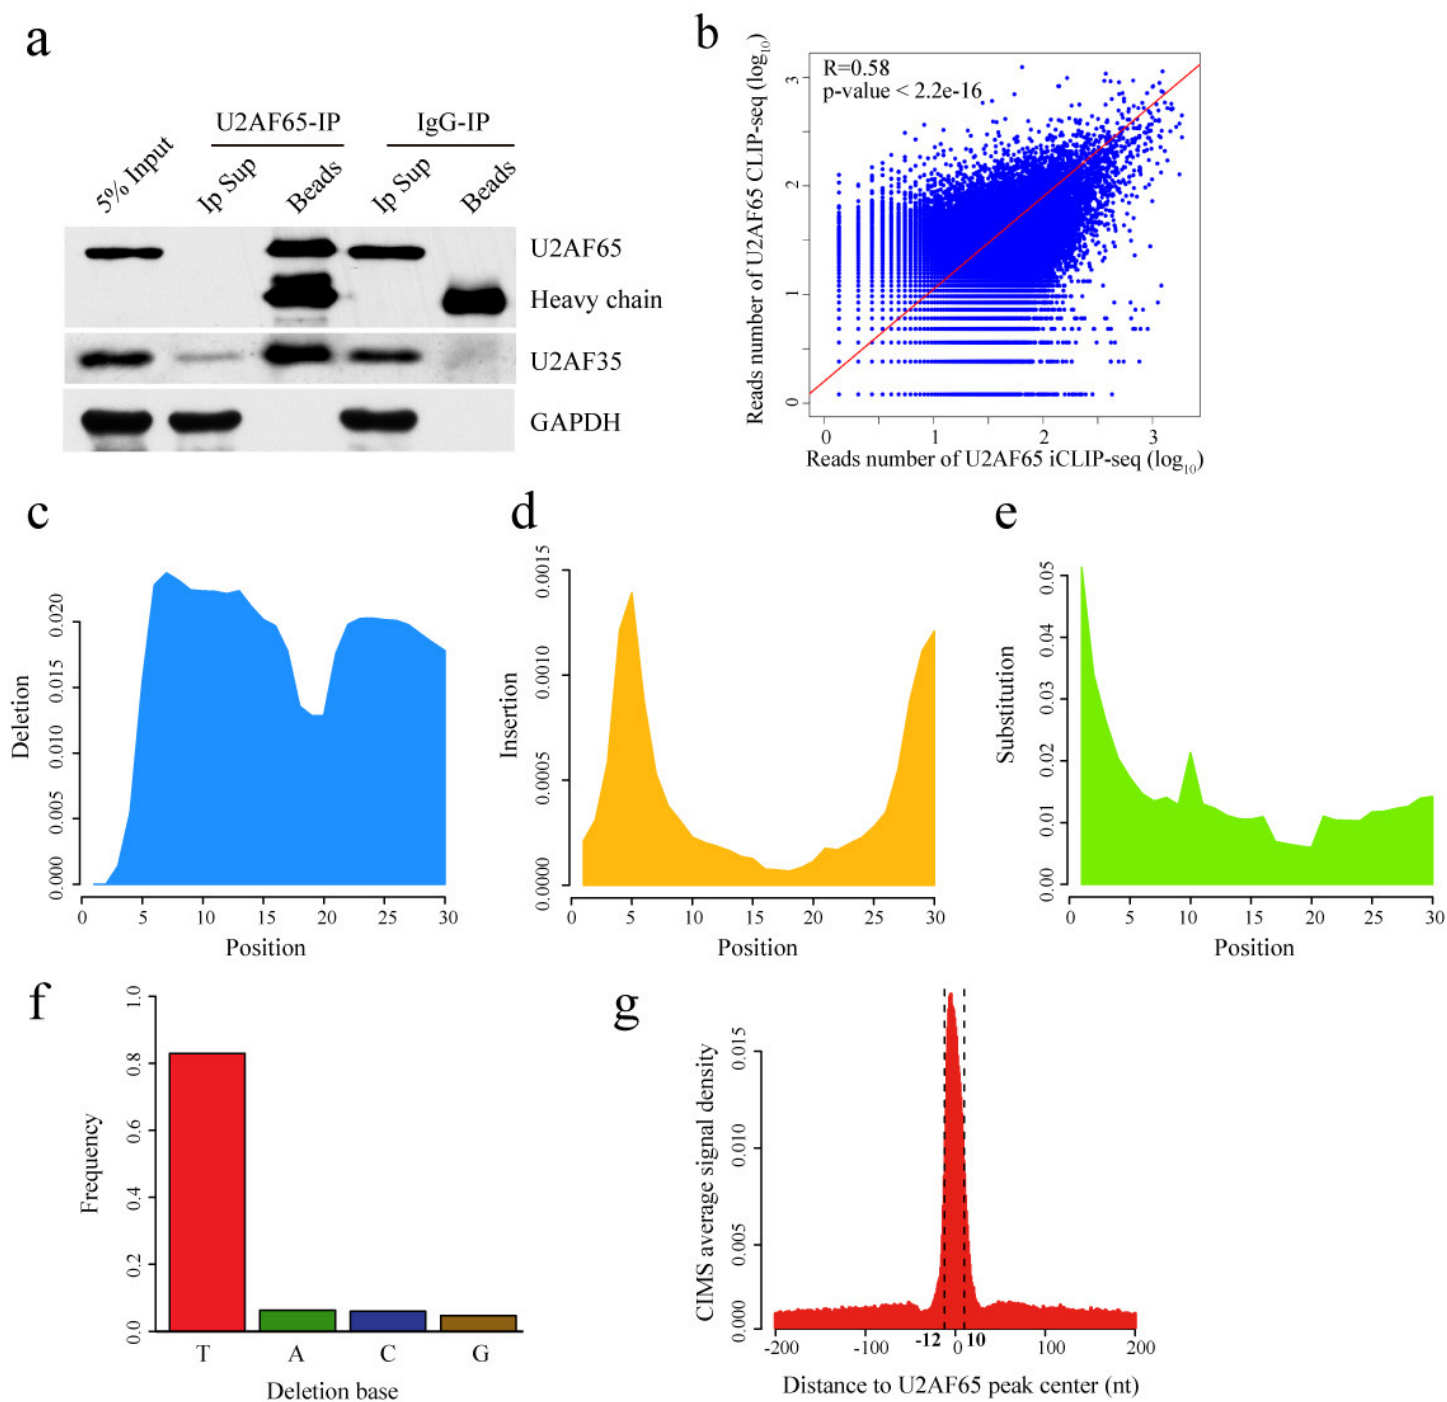

### Supplementary Figure 1

Mapping of U2AF65 CLIP tags to the human genome.

(a) Western analysis of the IP efficiency of anti-U2AF65 antibody. (b) Comparison between U2AF65 CLIP-seq data generated in the current study with the published U2AF65 iCLIP-seq data<sup>17</sup>. (c,d,e) Profiles of base deletion (c), insertion (d) and substitution (e) detected by CIMS analysis of U2AF65-RNA interactions<sup>37</sup>. (f) Preferential deletion mutation on uridine residues in CIMS. (g) Footprint of U2AF65 binding on RNA based on CIMS.

**a**

| Rank | Motif  | Z-Score | Rank | Motif  | Z-Score |
|------|--------|---------|------|--------|---------|
| 1    | TTTCTT | 291.73  | 11   | TTGTTT | 218.16  |
| 2    | TTTTTC | 287.13  | 12   | TCTCTT | 215.60  |
| 3    | TTTTCT | 284.90  | 13   | CTTTT  | 205.42  |
| 4    | TTCTTT | 265.92  | 14   | TTTCCT | 201.44  |
| 5    | TCTTTT | 248.90  | 15   | TTTGTT | 196.16  |
| 6    | TGTTTT | 236.20  | 16   | TCTTTC | 183.32  |
| 7    | TTCCTT | 234.80  | 17   | TCCTTT | 177.87  |
| 8    | TTTCTC | 226.90  | 18   | CTTTTC | 176.71  |
| 9    | TTCTCT | 223.15  | 19   | TTCTTC | 165.66  |
| 10   | TTTTCC | 218.24  | 20   | GTTTTT | 163.49  |

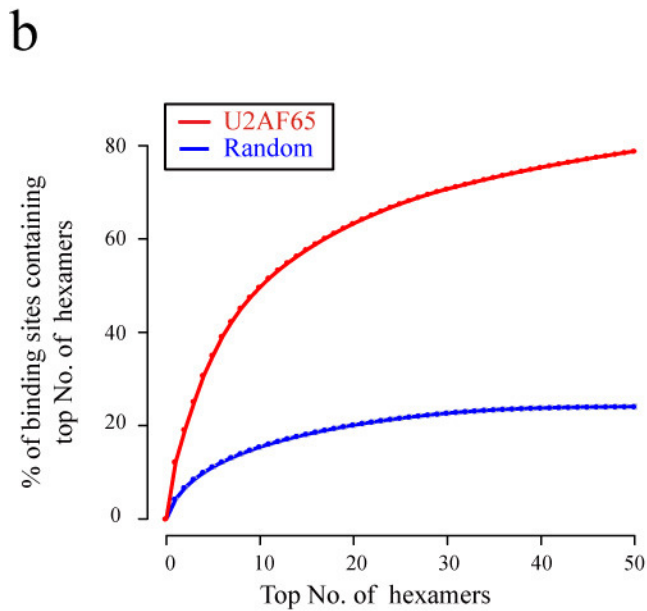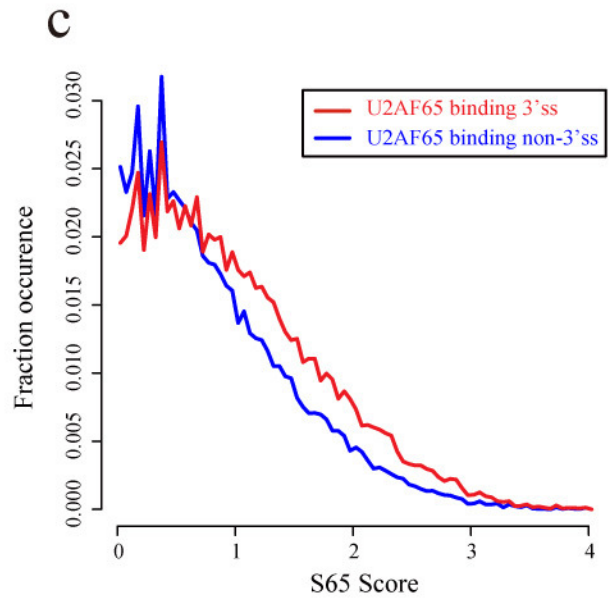

### Supplementary Figure 2

Enriched motifs in U2AF65-binding sites.

(a) List of top 20 enriched hexamers. (b) Percentage of U2AF65 binding sites that contain one or more top 50 motifs (red), compared with randomly selected 50 hexamers (blue). (c) S65 scores of U2AF65 binding sites in 3' splice sites and non-3' splice sites<sup>18</sup>.

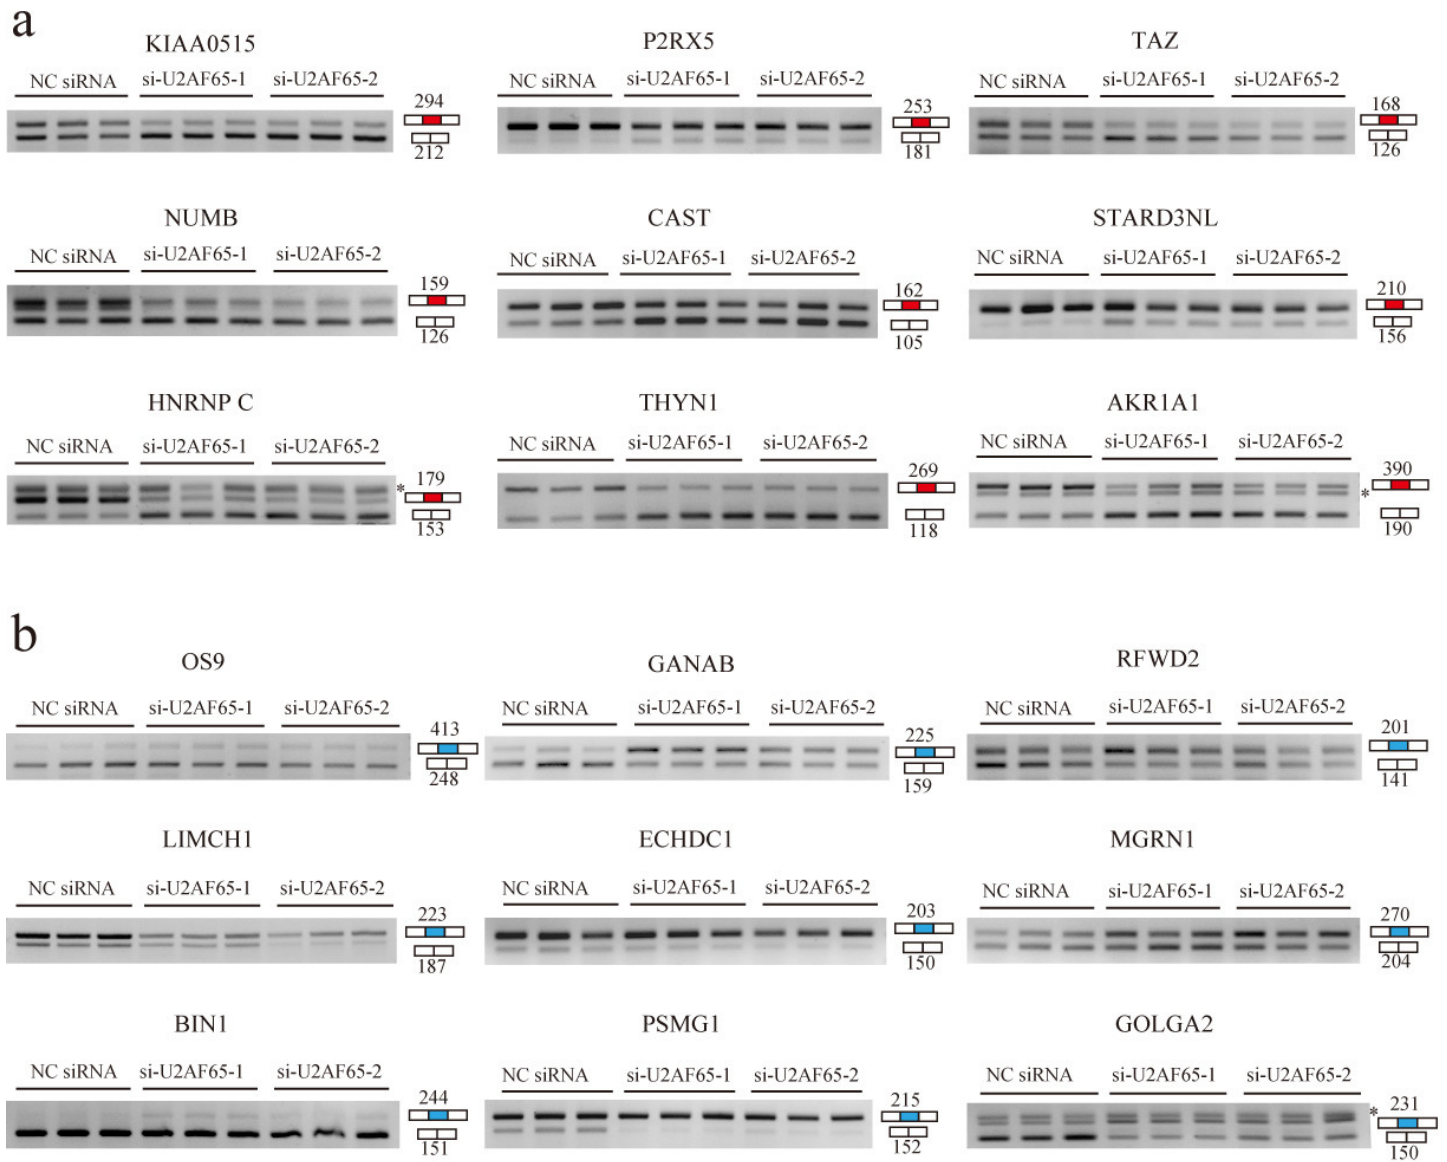

### Supplementary Figure 3

RT-PCR validation of U2AF65 RNAi-induced alternative splicing.

(a) Induced exon skipping events in response to U2AF65 RNAi. (b) Induced exon inclusion events in response to U2AF65 RNAi.

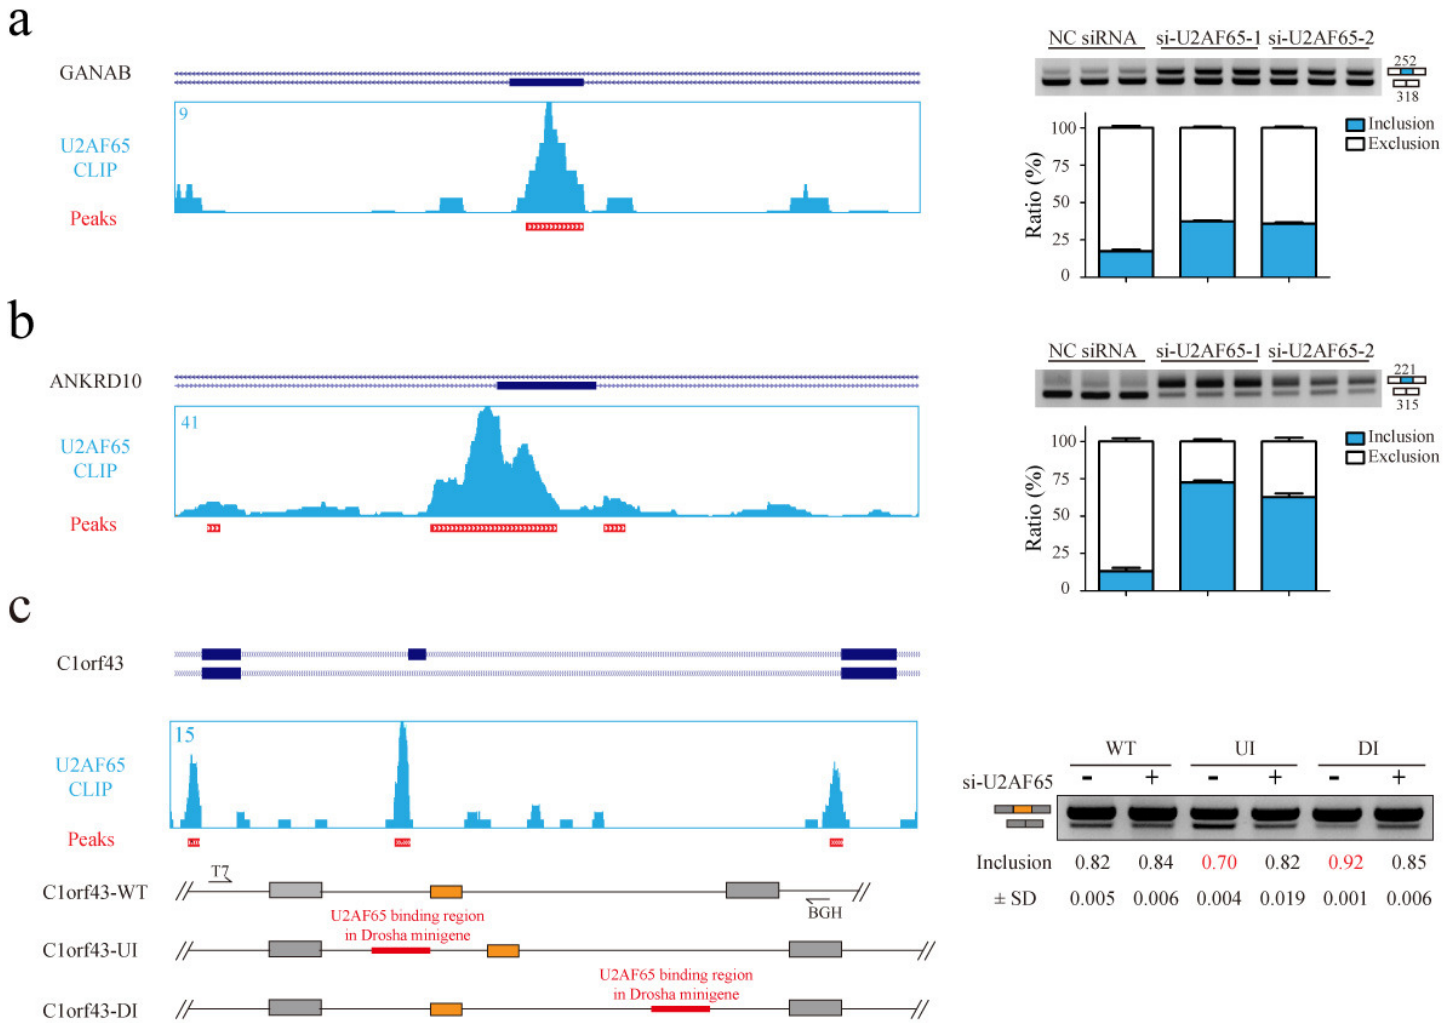

**Supplementary Figure 4**

U2AF65 binding profile on representative genes and insertion mutational analysis of U2AF65-binding site-induced changes in alternative splicing.

(a) U2AF65 binding on the alternative exon in *GANAB*. (b) U2AF65 binding on the alternative exon in *ANKRD10*. PCR-validated splicing changes are shown in the right. (c) The minigene constructs illustrating the insertion of the U2AF65 binding site from an intronic region in *DROSHA* (see Fig. 4d) into an U2AF65 insensitive gene *C1orf43* either in an upstream or a downstream intronic location. Bottom panel: RT-PCR analysis of wt and mutant minigenes in response to U2AF65 RNAi.

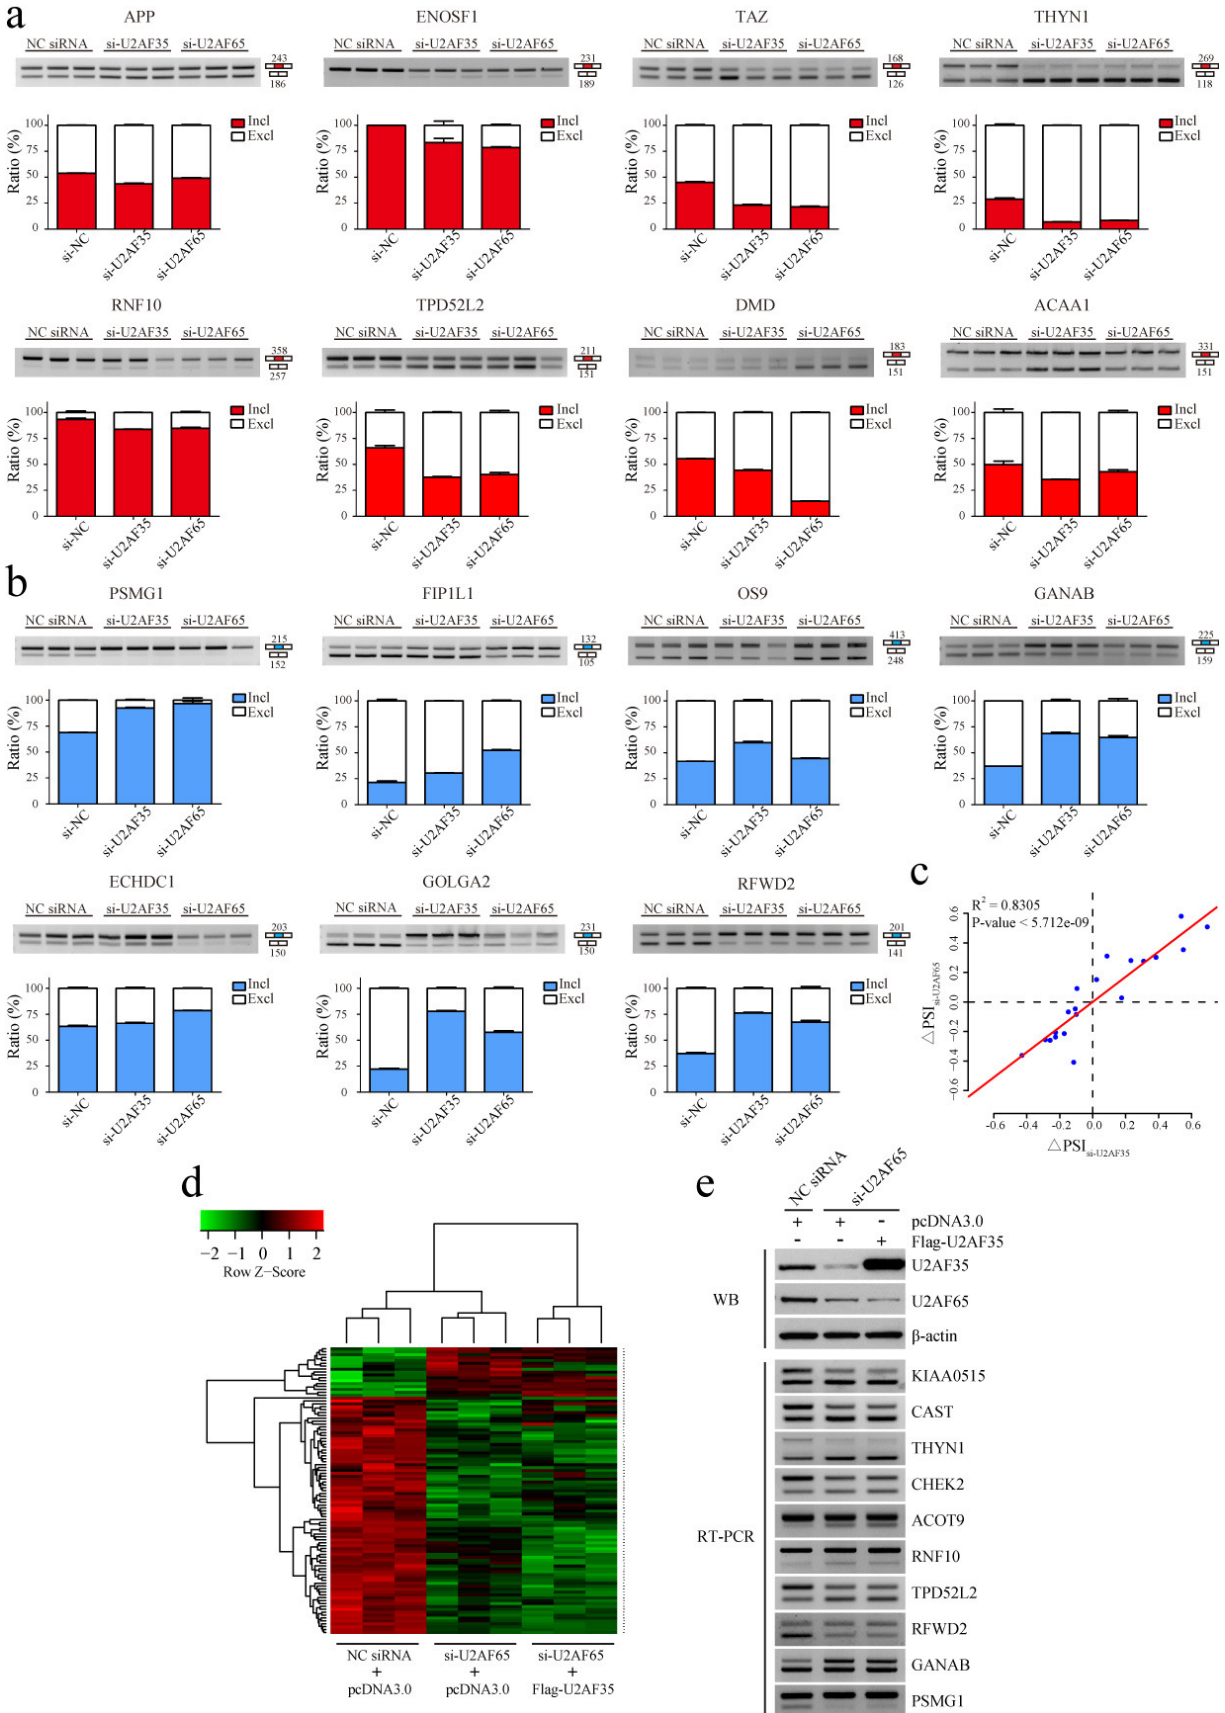

## Supplementary Figure 5

Similar effects of U2AF65 RNAi and U2AF35 RNAi on alternative splicing.

(a) Examples of induced exon skipping events in response to U2AF65 or U2AF35 RNAi. (b) Examples of induced exon inclusion events in response to U2AF65 or U2AF35 RNAi. (c) Concordant splicing response to U2AF65 and U2AF35 RNAi determined by RT-PCR.  $\Delta$ PSI: Difference of Percentage of Splicing In (PSI) between HeLa cells treated with U2AF35 or U2AF65 siRNA and negative control (NC) siRNA. (d) Heatmap showing similar U2AF65 RNAi-induced splicing events with or without exogenously expressed U2AF35. (e) RT-PCR validation of a set of U2AF65 RNAi-induced splicing events in the presence or absence of overexpressed U2AF35.

Supplementary Table 1: Deep sequencing statistics

| a: RNA-Seq            |          |                   |
|-----------------------|----------|-------------------|
|                       | Ctrl     | Knock down U2AF65 |
| total reads           | 28228751 | 25595461          |
| mapped reads          | 14384722 | 17183922          |
| mapped ratio          | 50.96%   | 67.14%            |
| uniquely mapped reads | 14119360 | 16834141          |
| uniquely mapped ratio | 91.16%   | 97.96%            |

| b: U2AF65 CLIP-Seq    |          |
|-----------------------|----------|
| total reads           | 19513772 |
| mapped reads          | 12088822 |
| mapped ratio          | 61.95%   |
| uniquely mapped reads | 9329565  |
| uniquely mapped ratio | 77.18%   |
| reads with CIMS       | 1482140  |

| c: RASL-Seq                                |                   |                   |
|--------------------------------------------|-------------------|-------------------|
|                                            | Knock down U2AF35 | Knock down U2AF65 |
| total detectable events                    | 1892              |                   |
| significantly changed events               | 334               | 271               |
| co-changed events                          | 208               |                   |
| events in the same directions              | 206               |                   |
| ratio of same direction changes over total | 99%               |                   |

Supplementary Table 2: List of primers used to express U2AF and its mutants

| Expressed gene | Forward Primer (5'--3')                                              | Reverse Primer (5'--3')                                                |
|----------------|----------------------------------------------------------------------|------------------------------------------------------------------------|
| U2AF35-WT      | CATAAGCTTGCCACCATGGATTACA<br>AGGATGACGACGATAAGGCGGAGT<br>ATCTGGCCTCC | TGAGGATCCTCACAGATCCTCTTCAGAG<br>ATGAGTTTCTGCTCGAATCGCCCAGATC<br>TTTCAC |
| U2AF35-S34Y    | CGTCATGGAGACAGGTGCTATCGG<br>TTGCACAATAAACCG                          | CGGTTTATTGTGCAACCGATAGCACCTG<br>TCTCCATGACG                            |
| U2AF35-S34F    | CGTCATGGAGACAGGTGCTTTCGGT<br>TGCACAATAAACCG                          | CGGTTTATTGTGCAACCGAAAGCACCTG<br>TCTCCATGACG                            |
| U2AF35-Q157R   | CAGAGAAGCCTGCTGCCGTCGGTA<br>TGAGATGGGAGAATGC                         | GCATTCTCCCATCTCATAACCGACGGCAG<br>CAGGCTTCTCTG                          |
| U2AF35-Q157P   | CAGAGAAGCCTGCTGCCGTCGGTA<br>TGAGATGGGAGAATGC                         | GCATTCTCCCATCTCATAACCGACGGCAG<br>CAGGCTTCTCTG                          |
| U2AF35-Del-UHM | CTTCCCAGTCTGCTGACGGTACGGA<br>CTTCAGAGAAGCCTGC                        | GCAGGCTTCTCTGAAGTCCGTACCGTCA<br>GCAGACTGGGAAG                          |
| U2AF65-WT      | CATAAGCTTGCCACCATGGATTACA<br>AGGATGACGACGATAAGTCGGACT<br>TCGACGAGTTC | TGAGGATCCTCACAGATCCTCTTCAGAG<br>ATGAGTTTCTGCTCCAGAAGTCCCGGC<br>GGTG    |
| U2AF65-R18W    | GCTCAACGAGAATAAACAAGAGTGG<br>GGACAAGGAGAACCGGCATCG                   | CGATGCCGGTTCTCCTTGTCCCACTCTTG<br>TTTATTCTCGTTGAGC                      |
| U2AF65-M144I   | GCCCGTGGTCGGGAGCCAGATCAC<br>CAGACAAGCCCGGCCTC                        | GAGGCGCCGGGCTTGTCTGGTGATCTGG<br>CTCCCGACCACGGGC                        |
| U2AF65-L187V   | CAGGCCCTGGCAACCCAGTGGTG<br>GCTGTGCAGATTAACCAGG                       | CCTGGTTAATCTGCACAGCCACCACTGG<br>GTTGCCAGGGGCCTG                        |



Supplementary Table 3: Oligonucleotides for cloning of minigene reporter plasmids and RT-PCR quantification

|                           |                |                                                       |
|---------------------------|----------------|-------------------------------------------------------|
| TPD52L2-WT                | Forward        | TGACTCGAGGGACCATATGGTCCCACA                           |
|                           | Reverse        | TGACCCGCGGAGAGCACCCAGATGTACAG                         |
| TPD52L2-Del               | Forward        | TGCCTGTATCATCAGCACCAACTTTTGTGGAACAGGG                 |
|                           | Reverse        | CCCTGTTCCACAAAAGTTGGTGCTGATGATACAGGCA                 |
| EIF4A2-WT                 | Forward        | CGCAAGCTTGCTCGCGGGATTGATGT                            |
|                           | Reverse        | CCGCTCGAGGTGATCGCCTATTCAGCAAC                         |
| EIF4A2-UD                 | Forward        | CAGCATCTTGGCTGTATTGAATTCGAGTGAACCCTGGTTT<br>AGTTATA   |
|                           | Reverse        | TATAACTAAACCAGGGTTCCTCGAATTCAATACAGCCA<br>AGATGCTG    |
| EIF4A2-DD                 | Forward        | GAGCGAGTCGGTATTTATATTTGGATCCAGTTAGAAGCA<br>CGAACTA    |
|                           | Reverse        | TAGTTCGTGCTTCTAACTGGATCCAAATATAAATACCGAC<br>TCGCTC    |
| Drosha-WT                 | Forward        | TGAGGATCCAGAGCGAGAACGGGAGAGAC                         |
|                           | Reverse        | TGACTCGAGCACCTGATCCATGGGGTCAC                         |
| Drosha-Del                | Forward        | GAACACAAATGTGTTTCATGATAGCCCGTATTGTAATGTCT<br>GGAAGTTA |
|                           | Reverse        | TAACCTCCAGACATTACAATACGGGCTATCATGAACACA<br>TTTGTGTTT  |
| C1orf43-WT                | Forward        | CCCAAGCTTGACTTGAAAGAGGAGATTGATATTCG                   |
|                           | Reverse        | ATGCTCGAGCCCTGTCCCATAGCGGGCTGTTC                      |
| C1orf43-UP-AgeI           | Forward        | CAGTCTCAGCTCACTGCAACACCGGTCTCCACCCCTTGT<br>TCAAGC     |
|                           | Reverse        | GCTTGAACAAGGGGGTGGAGACCGGTGTTGCAGTGAGCT<br>GAGACTG    |
| C1orf43-Down-AgeI         | Forward        | GCATGGTGGTGCACATCTGTACCGGTAATCCCAGCTAAT<br>CAGGAGG    |
|                           | Reverse        | CCTCCTGATTAGCTGGGATTACCGGTACAGATGTGCACC<br>ACCATGC    |
| U2AF65 binding region     | Forward        | ATAACCGGTATTATTAGTTTTGTTAAATTATGG                     |
|                           | Reverse        | ACTACCGGTTGGGAGGATTAGAAAGATTATAC                      |
| U2AF65 non-binding region | Forward        | GAGAGTTAGAAGCCAGCCACC                                 |
|                           | Reverse        | CCACCGCCTCCTGGGTT                                     |
| Quantification primer 1   | T7 Promoter    | TAATACGACTCACTATAGG                                   |
|                           | BGH-Rev-primer | TAGAAGGCACAGTCGAGG                                    |
| Quantification primer 2   | EGFP-Forward   | CTGGTCGAGCTGGACGGCGACG                                |
|                           | EGFP-Reverse   | TTCTTCTGCTTGTCGGCCAT                                  |

Supplementary Table 4: List of primers used to validate U2AF-regulated splicing events

| Gene Symbol | Forward Primer (5'--3')     | Reverse Primer (5'--3')        | Short isoform (nt) | Long isoform (nt) | Validated |
|-------------|-----------------------------|--------------------------------|--------------------|-------------------|-----------|
| EFNA1       | GCGCTTCACACCTTTCACC         | GCAAGTCTCTTCTCTGTGGA           | 108                | 170               | Yes       |
| UHL5        | TCTGCCTTTCATTATGGAATTG      | TGCCTCAGCTATTCAAAAATC<br>TC    | 199                | 274               | Yes       |
| CD46        | TGGAGTTGCAGTAATTTGTGT<br>TG | GCAAACCAGGTTGTGGAATC           | 156                | 249               | Yes       |
| STAG3L2-E7  | CTGGATGGTTTCCATGATCG        | AAGGACAGCAGAAGCTGGAA           | 177                | 285               | Yes       |
| STAG3L2-E4  | CCAAGCGGTACATCGTCATA        | GAAGCGGCCAGTGAAGAG             | 187                | 311               | Yes       |
| SEC16A      | TAAGCTTGCAGCGTCACTC         | CAGCTGAGCAGGGTTGTAGA           | 143                | 203               | Yes       |
| EIF4G2      | GGGACGTCATCGTTCAAATC        | TGGTGGTTGTGCACTAGGAG           | 205                | 319               | Yes       |
| FAM76B      | CTCCAAAGAAAAAGCCAAA         | AATGGTCTGGTCTCTCTGCTG          | 167                | 225               | Yes       |
| CCDC53      | GGTGTACAGTGATGGCAATAA<br>GA | GAAGATTCGCTATCTGAACTT<br>TCTTC | 136                | 222               | Yes       |
| PIGQ        | GCTCGTGGACCTCATCAACT        | ATGAGCTCCCAAGGAACAG            | 190                | 252               | Yes       |
| SAT1        | TTTGGAGAGCACCCCTTTTA        | CTCATCACGAAGAAGTCTCTCA<br>A    | 158                | 268               | Yes       |
| ANKRD36B    | AGCTCTGCTGGATGCTTCAT        | TTTCTCAAGCCGCTCAATTT           | 164                | 235               | Yes       |
| EIF4A2      | GCTCGCGGGATTGATGTGC         | GAATCCTCTTGTCTTCTTC            | 154                | 261               | Yes       |
| HNRPDL      | AGCACTTATGGCAAGGCATC        | TCTTCAATGTGCTCTGCAA            | 129                | 234               | Yes       |
| MYOF        | CTAAAATTGCTGCCTCTGGTG       | TGGGAATCCCGTGTACTCTC           | 128                | 167               | No        |
| NAP1L4      | GAAGGTGACGAGGAGGGAGA        | CCTCCGCTTCTACTGCTG             | 100                | 138               | No        |
| ANKRD10     | TGAGGGTGAACTCCCATTC         | GAACTGGGCACACTCTTGG            | 161                | 255               | Yes       |
| GIT1        | GCTGGCCTTCTACCTCTGTG        | TTCTCTTCGATCCACCTCGT           | 187                | 214               | Yes       |
| ACOT9       | CAAAGGGCAGTTACTCCTG         | GGCAGTCCATCCTGTGATT            | 201                | 228               | Yes       |
| KIAA0515    | ATGAAAGGCTTCCACTTTGC        | TCAGGCCTTACTCTCTCCA            | 212                | 294               | Yes       |
| ENOSF1      | AGCCATTGTGGATTGAGGAG        | ACTTTTGGCCATCAGCAAT            | 189                | 231               | Yes       |
| THYN1       | AGAGGCTTACCCAGACCACA        | CCTCCAGGCTCAAAACAAA            | 118                | 269               | Yes       |
| CHEK2       | CAGCTCTCAATGTTGAAACAG<br>AA | CTGCACAGCCAAGAGCATC            | 150                | 212               | Yes       |
| CAST        | TGAGAAGAAGTCACAGTCAA<br>CCA | TCAGCTGATCTGGAAACTGCT          | 105                | 162               | Yes       |
| MGRN1       | TGGAGCATGATGAGCACTCT        | TGTCCAGGATGTGGTCGATA           | 204                | 270               | Yes       |
| HNRNPC      | GCAGCAGTCGGCTTCTCTAC        | CATGGAGCGAGGATCTGTCT           | 153                | 179               | Yes       |
| TAZ         | AGATGGCGTCTACCAGAAGG        | AGGATGATGGGGTTGAGATG           | 126                | 168               | Yes       |
| STARD3NL    | CTTCTGGCAGTTTTTCGATTT       | CAGGAACCACGTCTCAATCC           | 156                | 210               | Yes       |
| c16orf35    | CAACAATTTGGCAACCAAG         | ACGGGACAGGTTATGCAGAC           | 158                | 233               | Yes       |
| FIP1L1      | AGCTCCTCCCACTCACCTTC        | CCTGGTGGAGGAGGAAAAC            | 105                | 132               | Yes       |
| PCBP2       | GTTGGCAATGCAACAGTCTC        | CGTTTGGAAATGGTGAGTTCAT         | 110                | 149               | Yes       |
| CALD1       | GGAAGAGGAGAAGCCAAAGC        | TGTGGGTCATGAATTCTCCA           | 161                | 239               | Yes       |
| APP         | CCGCTGGTACTTTGATGTGA        | TTCTCATCCCCAGGTGTCTC           | 186                | 243               | Yes       |
| SGCE        | GGAAGTGATTCTGGAGAGG         | GCACTGTGATGGACCAGTTG           | 204                | 231               | Yes       |
| ZNF207      | CCTCCAATGACTCAAGCACA        | ACCAACAGGTCCTTGGACAG           | 156                | 249               | Yes       |
| OS9         | TGGGCTGAAGAAGGAGTCAG        | TCGTGTCTCATCAGTCAGC            | 248                | 413               | Yes       |

|          |                             |                           |     |     |     |
|----------|-----------------------------|---------------------------|-----|-----|-----|
| PICAML   | TGATGTAAATTGGAGTCAACC<br>AG | TCCTATCATGCCTGTTGGTG      | 151 | 175 | No  |
| FIP1L1   | GAGGATACGAATGGGACTTG<br>A   | TGGAAGCCCAGTCTTGAACA      | 160 | 229 | Yes |
| ECHDC1   | AGAGGGGAAAGGCCTCATT         | ATTCTGCTCCTCCACCCAAT      | 150 | 203 | Yes |
| PSMG1    | GTCTGGGAGGAAGTTGGTTG        | TGCATGTTCTTCCTTGGACA      | 152 | 215 | Yes |
| GOLGA2   | CTGCATCGTCTGCTAACCTG        | CGAGGATCCCTATGGTCTGA      | 150 | 231 | Yes |
| GANAB    | CCATTCCGCCTTGACCTACT        | ATCCCTGGGTGTTTCTCAG       | 159 | 225 | Yes |
| RFWD2    | CACATGCAGCCCAACTACAG        | TGTGTGATGGAGAAGGAGCT<br>T | 141 | 201 | Yes |
| MYO18A   | GCAGGCTGACCTAAAGTTGG        | ATCATCAGAAGCTGCCTTGG      | 202 | 247 | Yes |
| ADA      | GCTACCACACCCTGGAAGAC        | CCCGTTTGGTCATCTGGTAA      | 160 | 225 | Yes |
| AKR1A1   | ATGCTACGACTCCACCCACT        | TTGGGGATGCAGATCACTTT      | 190 | 390 | Yes |
| CEP78    | CCACAATGGCTGGGATAGAT        | GGACAGGAAAGGAGTCGAGA      | 216 | 264 | Yes |
| TPD52L2  | GGGAGCTGAAACAGAACCTG        | TCTCCAAGCTTCTGCTGAT       | 151 | 211 | Yes |
| TAZ-E5   | GCAGACATCTGCTTCACCAA        | TGGGAAGATATGCACCCAGT      | 150 | 240 | Yes |
| CEP164   | TCAGCCTCTTGGGTTTAGGA        | GAGGGCTTGCAAGGAGTAG       | 151 | 229 | Yes |
| MACF1    | CCTACTCGTTCCAGTCCAG         | GCAAGGGATGTCCGACTAGA      | 161 | 272 | Yes |
| DMD      | GCACAGGGTTAGAGGAGGTG        | TCTGCTCCTTCTTCATCTGTCA    | 151 | 183 | Yes |
| RNF10    | CCTGCTCCTCTGATTCTGCT        | GCTTGGCTGAAGGAATTTTG      | 257 | 358 | Yes |
| UBTF     | GAAATCGGACATCCAGAGA         | GTGAGGGTGGACTTGGTGAT      | 165 | 276 | Yes |
| NUMB     | CCTTGGCCATGTAGAAGTTGA       | CTGAGTCCATCTGCTGAGACC     | 126 | 159 | Yes |
| GSK3B    | GAACTCCAACAAGGGAGCAA        | GTGGTGTAGTCGGGCAGTT       | 174 | 213 | Yes |
| STX16    | GCCGATTAAGCAGAAGATG         | GCTGGGATCTTTCCTCTCG       | 155 | 318 | Yes |
| ACAA1    | TCACTGTGACCCAGGATGAG        | CTTGCAAAGGCCTCATTGAT      | 151 | 331 | Yes |
| BIN1     | CAAGCTGGTGGACTACGACA        | CTCCTCCTGCAGATCCACAT      | 151 | 244 | Yes |
| LIMCH1   | GAGGAATACCGCAAGAGCTG        | CTTGCCATTTGTCGTCTCT       | 187 | 223 | Yes |
| RBPJ     | ATAAATGATGGCGCTTCTG         | CTGGGACGACACAGAGCATA      | 152 | 256 | Yes |
| P2RX5    | CCCTGCAGAGTGCTGTCAT         | TTTCCAGCTGTAACCGCTTC      | 181 | 253 | Yes |
| HMGCR    | CGCCGACAGTTACTTTCCA         | GAGCCAGGCTTCACTTCTG       | 186 | 345 | Yes |
| OSBPL9   | AAACTGCATTGTGTTGCTG         | ACAGTCTGGGAAGGCATTGT      | 113 | 152 | Yes |
| ODF2L    | CTGAAATAGTAAAAAGCAGA        | GCTGAATAAGACAGTTTTCC      | 147 | 306 | Yes |
| IVNS1ABP | ATCAACTGGGTGCAGCGTAG        | CATCATCACTGCCAAACACC      | 151 | 292 | Yes |
| PCSK6    | GGAGCTCTCAGCCCCAGA          | TGAAGTGGACGCAGTTCAAG      | 167 | 206 | Yes |
| PPP2R5D  | CGTGTCTACTTCCCCTTCA         | GGAAGAGGGGTTCCATCACT      | 187 | 241 | Yes |
| TNFSF13  | CTGGGAGAATGGGGAGAGAT        | TCCTGGATTCCGACACCATA      | 150 | 198 | No  |
| RIPK2    | CATTCCCTACCACAACTCG         | AGGATGCGAAATCTCAATGG      | 185 | 339 | Yes |
| FXP1     | ACACTGATGCCAGCGAATCT        | AGCACTAGTTGGGCGCTTTA      | 198 | 290 | Yes |
| SETX     | TCACACGAGCCAAGTACAGC        | GCACAGGCTTGAGTTTCAGA      | 171 | 258 | Yes |
| ASUN     | TTGCACGTCCTTAGCAGTTC        | TTAGGGCCCTTTCCTCTTGT      | 245 | 416 | Yes |
