# Supplementary material
Source: PubMed Central journal article supplement (PMC4429597)

Fig 3C

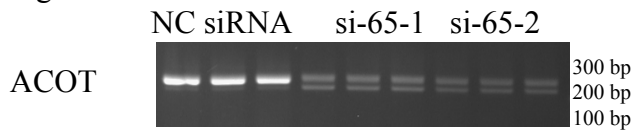

Fig 3D

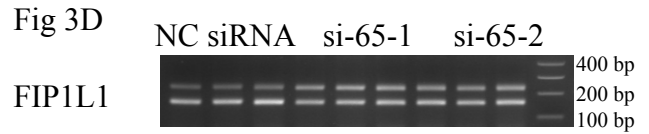

Fig 4C

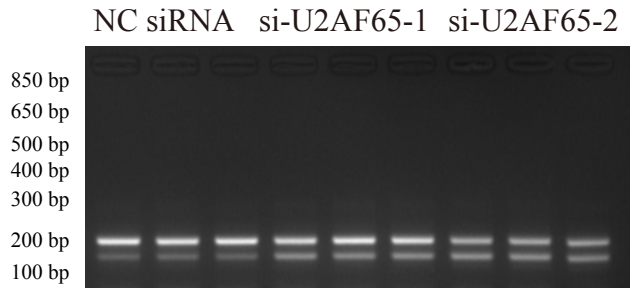

NC siRNA si-U2AF65  
WT DEL WT DEL

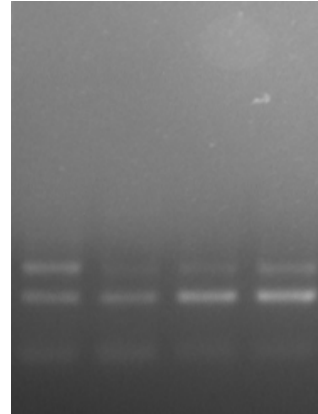

Fig 4D

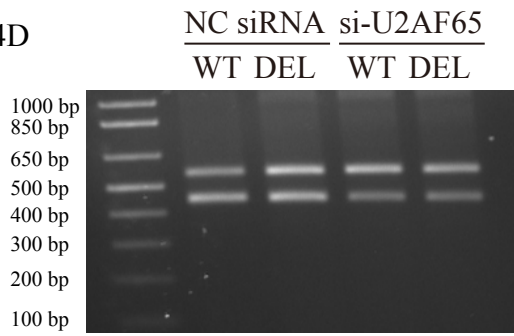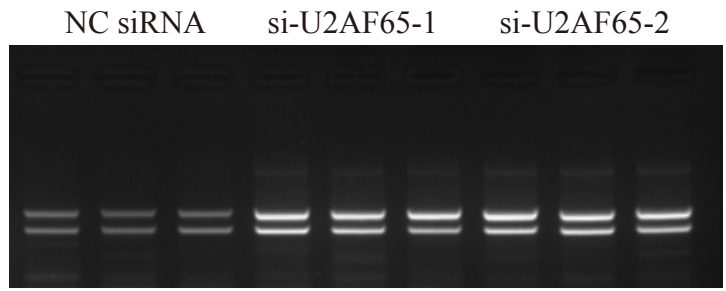

Fig 4E

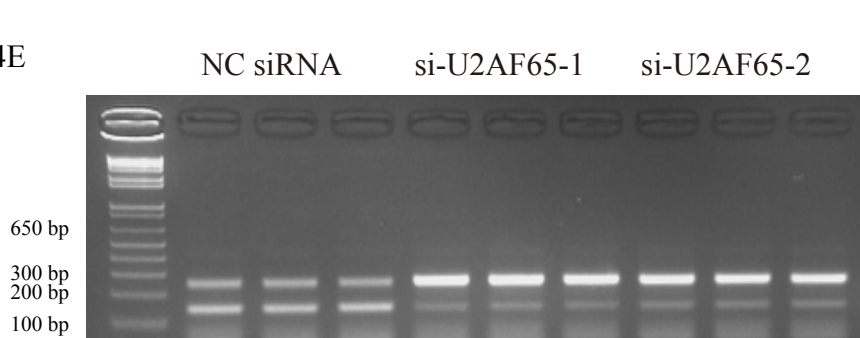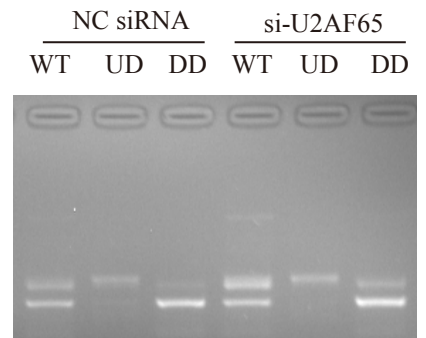

Fig 5A

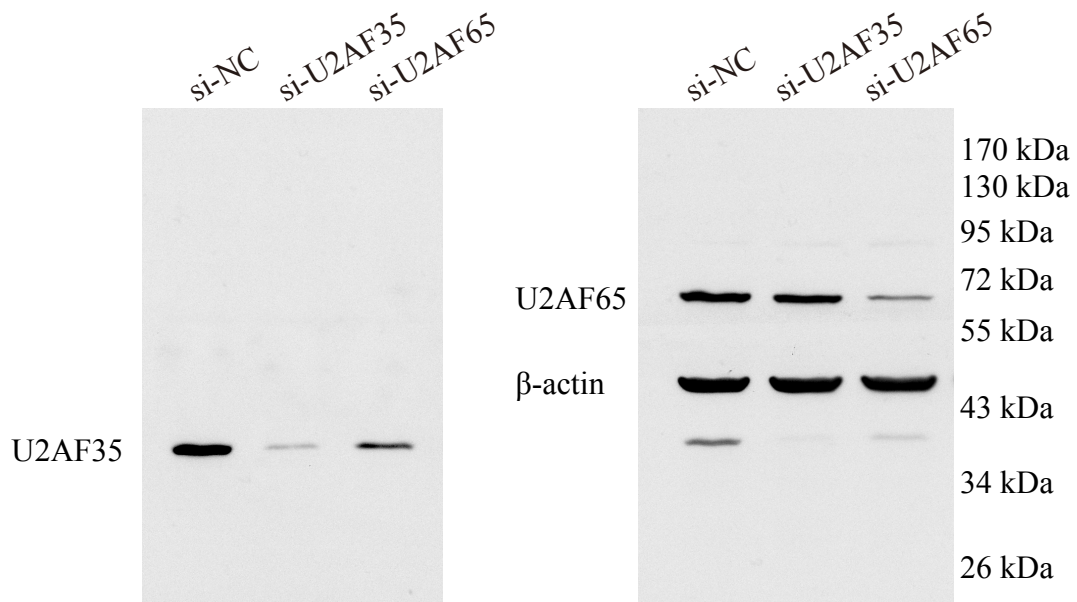

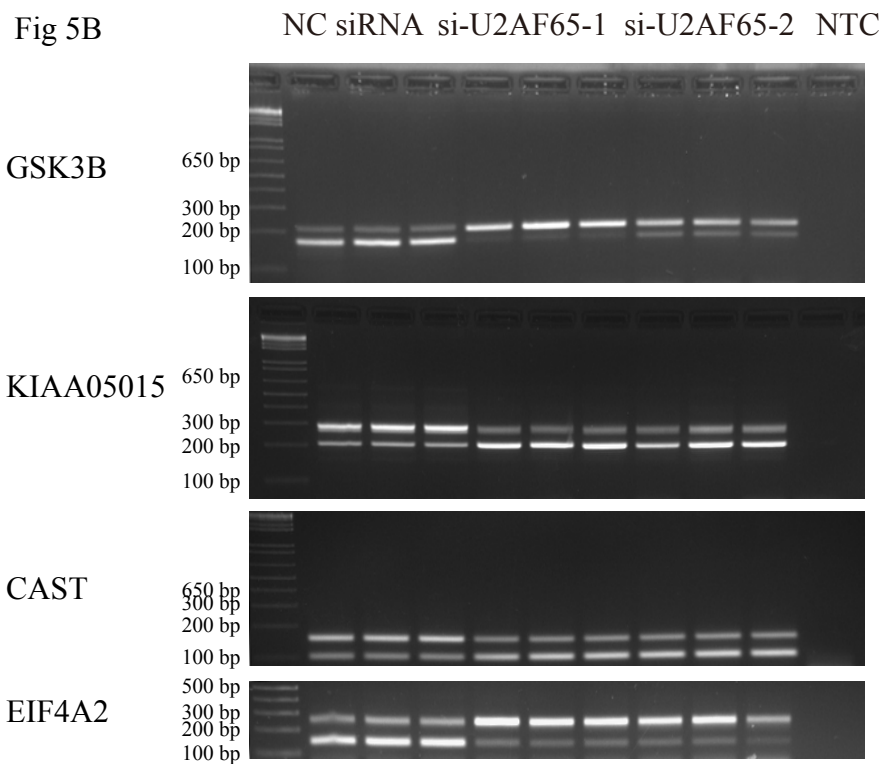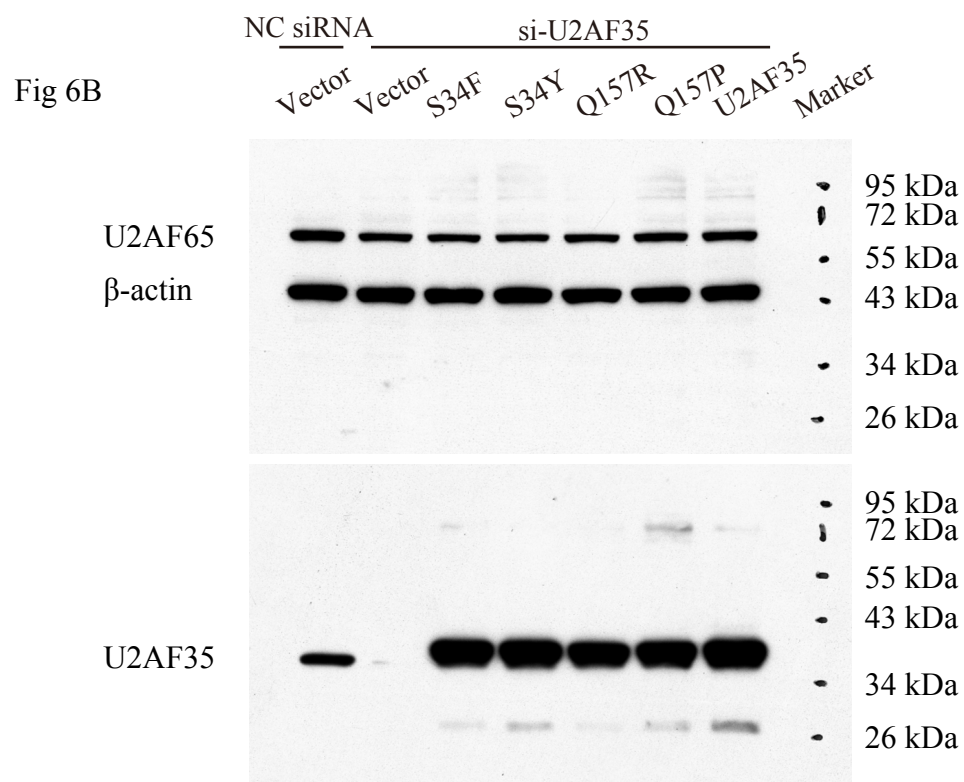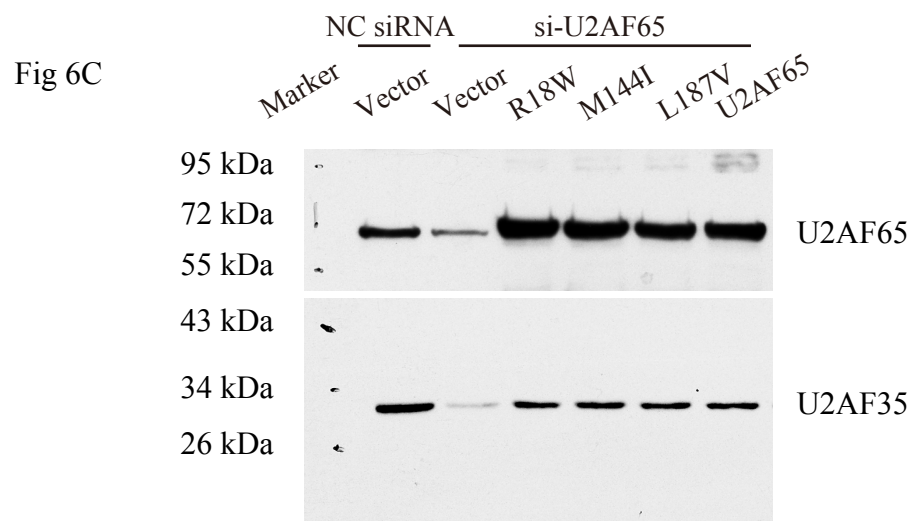

Supplement: NIHMS687526-supplement-S2.pdf [file NIHMS687526-supplement-S2.pdf]
